# Supplementary material
Source: publisher figshare collection journal article supplement (https://acs.figshare.com/ndownloader/files/5149135)

# Supporting Information For:

## Photochemical Organic Oxidations and Dechlorinations with a $\mu$ -Oxo Bridged Heme/Non-Heme Diiron Complex.

*Ian M. Wasser, H. Christopher Fry, Paul G. Hoertz, Gerald J. Meyer<sup>\*</sup> and Kenneth D.  
Karlin<sup>\*</sup>*

Department of Chemistry, Johns Hopkins University, Charles and 34<sup>th</sup> Streets, Baltimore,  
Maryland 21218

## **Contents:**

**Figure S1.** UV-visible spectra showing the photoreduction of  $[(^6\text{L})\text{Fe}^{\text{III}}-\text{O}-\text{Fe}^{\text{III}}-\text{Cl}]^+$  (**1**)  $\{\lambda_{\text{max}}$  418 (Soret), 575 nm $\}$  to  $[(^6\text{L})\text{Fe}^{\text{II}}\dots\text{Fe}^{\text{II}}-\text{Cl}]^+$  (**2**)  $\{\lambda_{\text{max}}$  415 (Soret), 432 (sh), 532, 550 (sh) nm $\}$  in benzene-triphenylphosphine.

**Figure S2.** UV-visible spectra showing the photoreduction of  $[(^6\text{L})\text{Fe}^{\text{III}}-\text{O}-\text{Fe}^{\text{III}}-\text{Cl}]^+$  (**1**)  $\{\lambda_{\text{max}}$  418 (Soret), 575 nm $\}$  to  $[(^6\text{L})\text{Fe}^{\text{II}}\dots\text{Fe}^{\text{II}}-\text{Cl}]^+$  (**2**)  $\{\lambda_{\text{max}}$  415, 430 (sh), 532, 550 (sh) nm $\}$  in toluene.

**Figure S3.** EI-MS spectrum for either biphenyl trichloride product  $\text{C}_{12}\text{H}_7\text{Cl}_3$  at  $m/z$  256, which is derived from the photolysis of  $[(^6\text{L})\text{Fe}^{\text{III}}-\text{O}-\text{Fe}^{\text{III}}-\text{Cl}]^+$  (**1**) in 1,2-dichlorobenzene. The calculated isotope pattern for  $\text{C}_{12}\text{H}_7\text{Cl}_3$  is shown at the bottom.

**Figure S4.** EI-MS spectrum for either biphenyl monochloride product  $\text{C}_{12}\text{H}_9\text{Cl}$  at  $m/z$  188, which is derived from the photolysis of  $[(^6\text{L})\text{Fe}^{\text{III}}-\text{O}-\text{Fe}^{\text{III}}-\text{Cl}]^+$  (**1**) in chlorobenzene. The calculated isotope pattern for  $\text{C}_{12}\text{H}_9\text{Cl}$  is shown at the bottom.

**Figure S5.** ESI-MS spectrum (positive ion mode) for  $\{[(^6\text{L})\text{Fe}^{\text{III}}-\text{Cl}\dots\text{Fe}^{\text{III}}-\text{Cl}]_2\text{O}\}^+$  (**3**) in showing the ion peak at  $m/z$  1221 which corresponds to the broken-oxo ion  $[(^6\text{L})\text{Fe}^{\text{III}}-\text{Cl}\dots\text{Fe}^{\text{III}}-\text{Cl}]^+$ . The inset shows the spectrum calculated for  $\text{C}_{63}\text{H}_{40}\text{N}_8\text{OFe}_2\text{Cl}_2\text{F}_6$ .

**Figure S6.** Full  $^1\text{H}$ -NMR spectrum for  $\{[(^6\text{L})\text{Fe}^{\text{III}}-\text{Cl}\dots\text{Fe}^{\text{III}}-\text{Cl}]_2\text{O}\}^+$  (**3**) recorded at 296 K in  $\text{CDCl}_3$ .

**Figure S7.** Diamagnetic region  $^1\text{H}$ -NMR spectrum for  $\{[(^6\text{L})\text{Fe}^{\text{III}}-\text{Cl}\dots\text{Fe}^{\text{III}}-\text{Cl}]_2\text{O}\}^{2+}$  (**3**) recorded in  $\text{CDCl}_3$ .

**Figure S1.** UV-visible spectra showing the photoreduction of  $[(^6\text{L})\text{Fe}^{\text{III}}\text{-O-Fe}^{\text{III}}\text{-Cl}]^+$  (**1**)  $\{\lambda_{\text{max}}$  418 (Soret), 575 nm $\}$  to  $[(^6\text{L})\text{Fe}^{\text{II}}\text{...Fe}^{\text{II}}\text{-Cl}]^+$  (**2**)  $\{\lambda_{\text{max}}$  415 (Soret) , 432 (sh), 532, 550 (sh) nm $\}$  in benzene-triphenylphosphine.

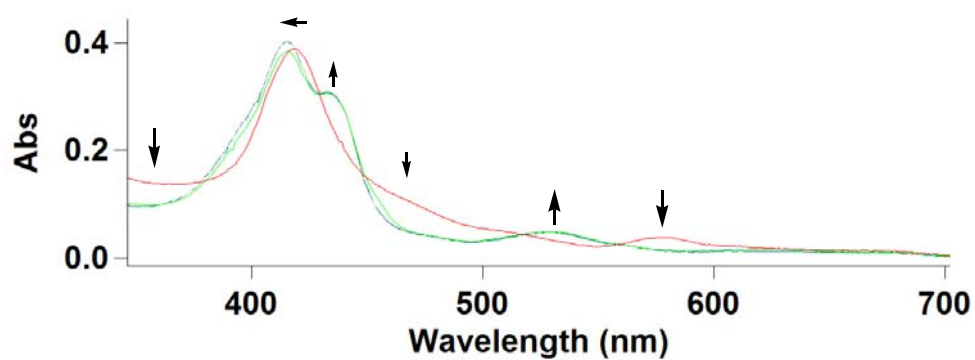

**Figure S2.** UV-visible spectra showing the photoreduction of  $[(^6\text{L})\text{Fe}^{\text{III}}\text{-O-Fe}^{\text{III}}\text{-Cl}]^+$  (**1**)  $\{\lambda_{\text{max}}$  418 (Soret), 575 nm $\}$  to  $[(^6\text{L})\text{Fe}^{\text{II}}\text{...Fe}^{\text{II}}\text{-Cl}]^+$  (**2**)  $\{\lambda_{\text{max}}$  415, 430 (sh), 532, 550 (sh) nm $\}$  in toluene.

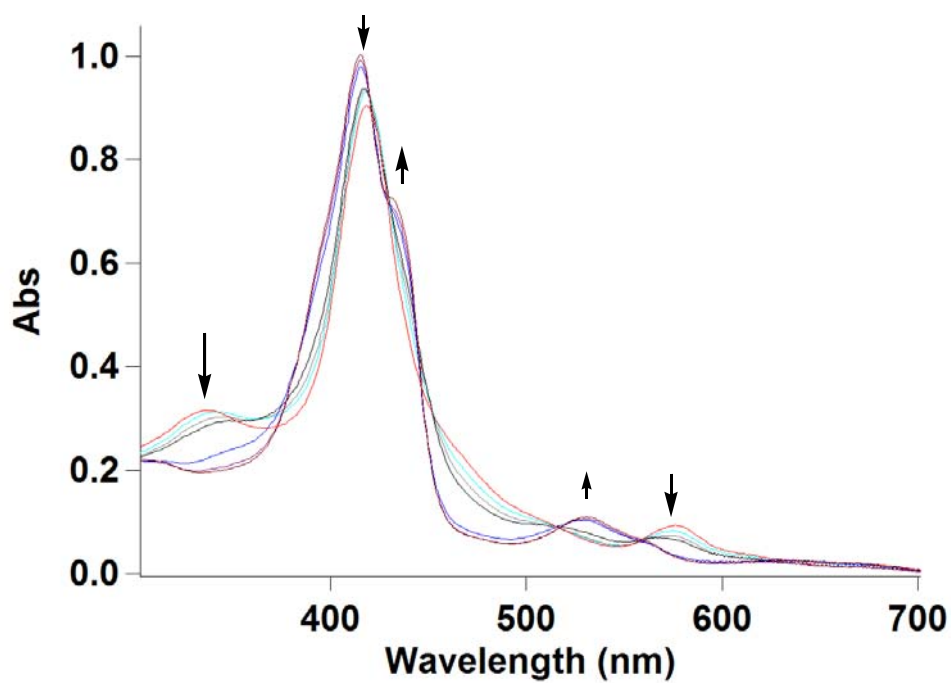

**Figure S3.** EI-MS spectrum for either biphenyl trichloride product  $C_{12}H_7Cl_3$  at  $m/z$  256, which is derived from the photolysis of  $[(^6L)Fe^{III}-O-Fe^{III}-Cl]^+$  (**1**) in 1,2-dichlorobenzene. The calculated isotope pattern for  $C_{12}H_7Cl_3$  is shown at the bottom.

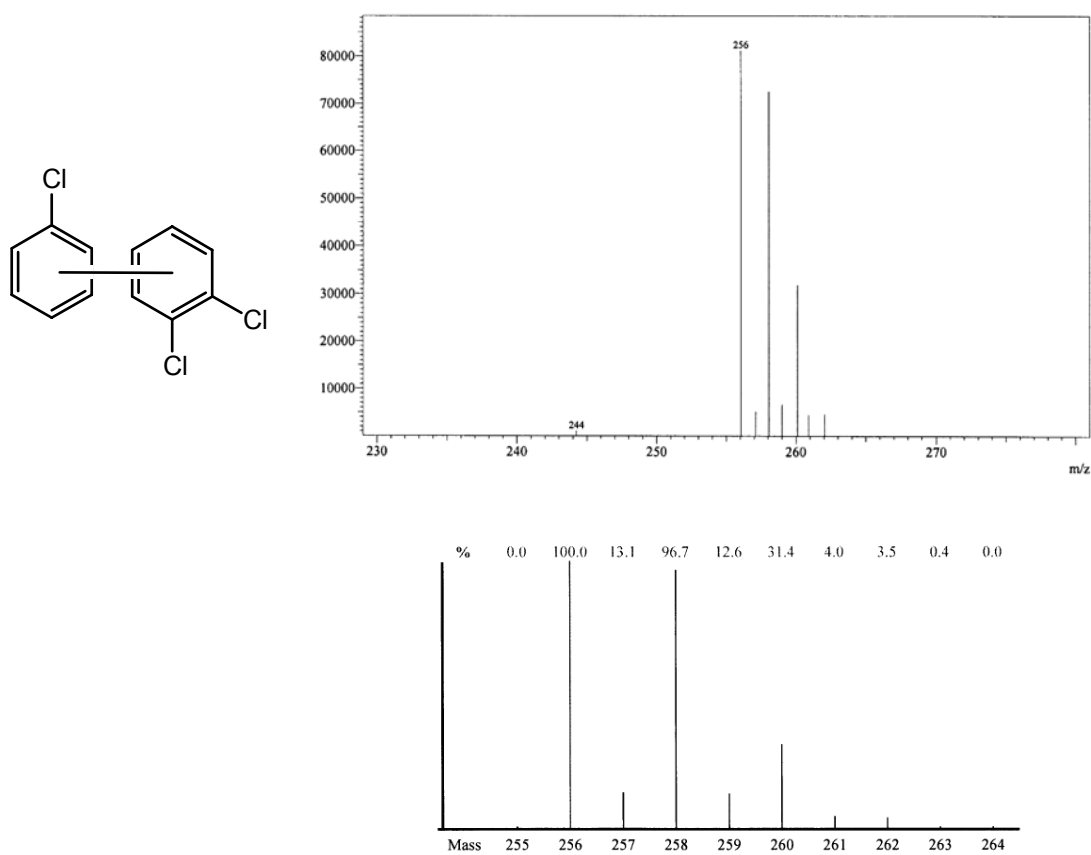

**Figure S4.** EI-MS spectrum for either biphenyl monochloride product  $C_{12}H_9Cl$  at  $m/z$  188, which is derived from the photolysis of  $[(^6L)Fe^{III}-O-Fe^{III}-Cl]^+$  (**1**) in chlorobenzene. The calculated isotope pattern for  $C_{12}H_9Cl$  is shown at the bottom.

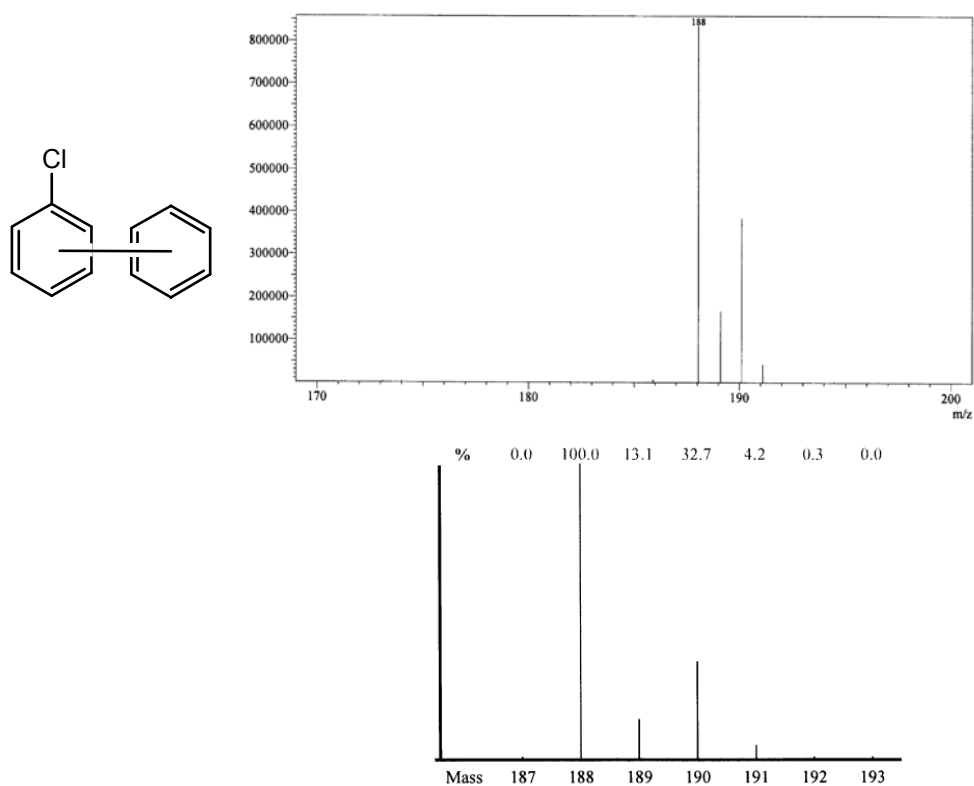

**Figure S5.** ESI-MS spectrum (positive ion mode) for  $\{[(^6\text{L})\text{Fe}^{\text{III}}-\text{Cl}\dots\text{Fe}^{\text{III}}-\text{Cl}]_2\text{O}\}^+$  (**3**) in showing the ion peak at  $m/z$  1221 which corresponds to the broken-oxo ion  $[(^6\text{L})\text{Fe}^{\text{III}}-\text{Cl}\dots\text{Fe}^{\text{III}}-\text{Cl}]^+$ . The inset shows the spectrum calculated for  $\text{C}_{63}\text{H}_{40}\text{N}_8\text{OFe}_2\text{Cl}_2\text{F}_6$ .

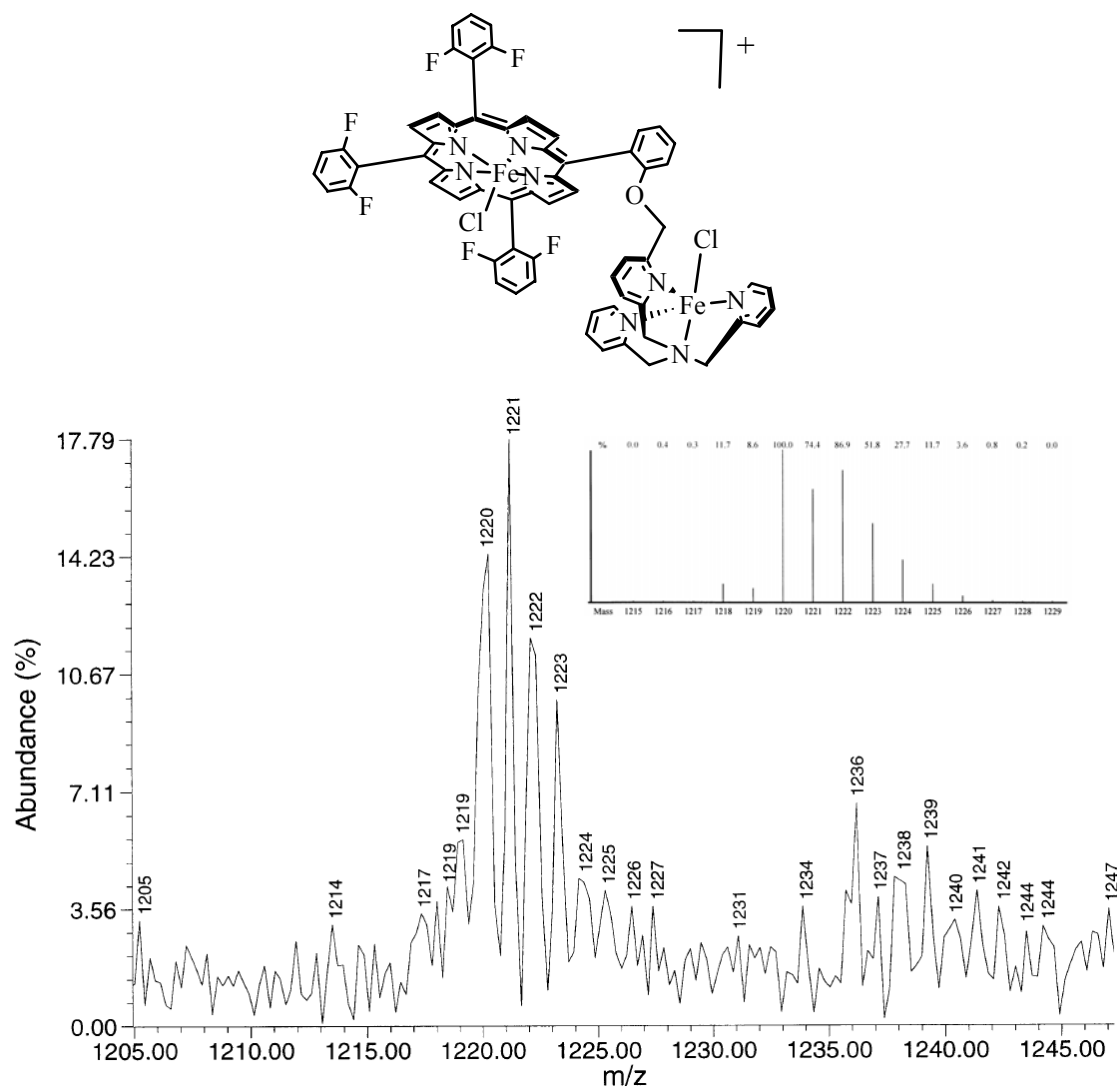

**Figure S6.** Full  $^1\text{H}$ -NMR spectrum for  $\{[(^6\text{L})\text{Fe}^{\text{III}}-\text{Cl}\dots\text{Fe}^{\text{III}}-\text{Cl}]_2\text{O}\}^+$  (**3**) recorded at 296 K in  $\text{CDCl}_3$ .

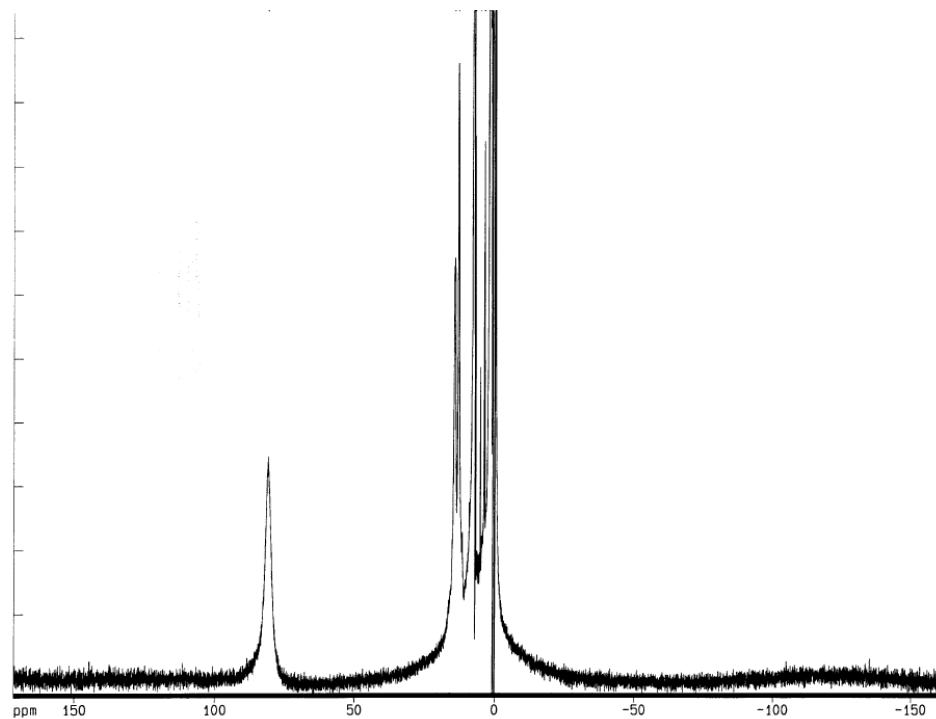



**Figure S7.** Diamagnetic region  $^1\text{H}$ -NMR spectrum for  $\{[(^6\text{L})\text{Fe}^{\text{III}}\text{-Cl}\dots\text{Fe}^{\text{III}}\text{-Cl}]_2\text{O}\}^{2+}$  (**3**) recorded in  $\text{CDCl}_3$ .

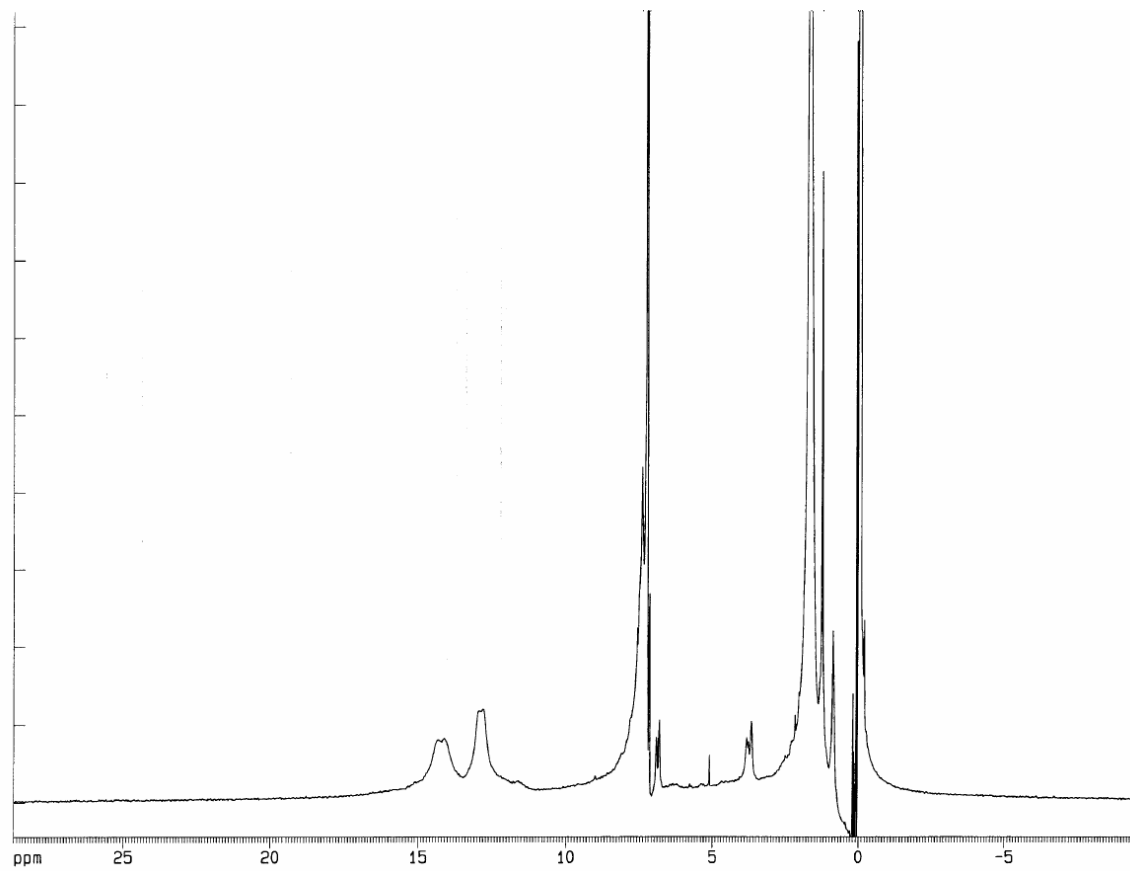

Supplement: Supplementary file 1 [file 5149135]
